# Supplementary material for: The application potential of machine learning and genomics for understanding natural product diversity, chemistry, and therapeutic translatability
Source: Royal Society of Chemistry journal article supplement (doi:10.1039/d0np00055h), 2020-11-27
Supplement: d0np00055h1.xlsx [file d0np00055h1.xlsx]

## Sheet: Methods
Name	Link	First published	Last updated	Category	Methods	Author's description	Highlights
UniLanguage	https://www.biorxiv.org/content/10.1101/2020.03.09.983585v1?ct=	2020	2020	Other	LSTM	Protein sequence prediction using language modeling on homology-reduced UniProt
BARLEY	https://www.pnas.org/content/117/1/371	2020	2020	BGC-NP Pairing	Retro-biosynthesis, alignment	Retrobiosyntesis processing of known RiPP structures combined with local alignment to genomic information in order to assign a novelty index to candidate RiPPs identified by genome mining and dereplicate known products
DeepRiPP/NLPPrecursor	https://www.pnas.org/content/117/1/371	2020	2020	NP Prediction	LSTM	Genomic and metabolomic platform that employs machine learning to automate the selective discovery and isolation of novel RiPPs	Beats RiPPMiner. Uses embedding pretraining, but only on the same train set
RRE-Finder	https://www.biorxiv.org/content/10.1101/2020.03.14.992123v1	2020	2020	Analysis	pHMM	Tool for identifying RiPP recognition element domains with high sensitivity
MetaBGC	https://science.sciencemag.org/content/366/6471/eaax9176	2019	2020	BGC Detection	segmented pHMM	Metagenomic identifier of biosynthetic gene clusters
BiG-SCAPE / CORASON	https://www.nature.com/articles/s41589-019-0400-9	2018	2020	Analysis	affinity propagation	Biosynthetic gene similarity clustering and prospecting engine (BiG-SCAPE), core analysis of syntenic orthologues to prioritize natural product gene clusters (CORASON)
DeepBGC	https://academic.oup.com/nar/article/47/18/e110/5545735	2018	2020	BGC Detection	pHMM + LSTM + Random Forest	BGC Detection and Classification Using Deep Learning
RODEO	https://www.ncbi.nlm.nih.gov/pubmed/28244986	2017	2020	NP Prediction	pHMM + SVM	Tool to identify BGCs and predict RiPP precursor peptides, namely lasso peptides	Used by antiSMASH
antiSMASH	https://academic.oup.com/nar/article/47/W1/W81/5481154	2011	2020	BGC+NP Prediction	pHMM + Rule-based	Secondary metabolite genome mining pipeline	Three sets of rules - strict, relaxed and loose
ARTS Resistance gene-based mining	https://academic.oup.com/nar/article/48/W1/W546/5840579	2017	2020	Analysis	pHMM	Exploration engine for antibiotic cluster prioritization and novel drug target discovery	Identifies targets of antibiotics using BGC and NP information. A second resistant copy of an antibiotic target gene is typically detectable in the genome, often found within the BGC of the antibiotic.
Google Brain ProtCNN/ProtENN	https://www.biorxiv.org/content/10.1101/626507v4	2019	2019	Other	Deep CNN	Predicting Pfam domains from unaligned amino acid sequences (faster and better than pHHMs)
NeuRiPP	https://www.nature.com/articles/s41598-019-49764-z	2019	2019	NP Prediction	LSTM, CNN	Neural network identification of RiPP precursor peptides	Tested on unseen classes
MetaMiner	https://www.sciencedirect.com/science/article/abs/pii/S2405471219303126	2019	2019	BGC-NP Pairing	Pipeline	A tool for discovering post-translationally modified peptides from spectra	Uses antiSMASH and improves upon RiPPquest by detecting more RiPP classes
NORINE	https://academic.oup.com/nar/article/48/D1/D465/5613672	2019	2019	NP Prediction	Toolbox	Platform that includes a database of nonribosomal peptides together with tools for their analysis
DDAP	https://academic.oup.com/bioinformatics/article/36/3/942/5559484	2019	2019	NP Prediction	Random Forest	Tool for predicting the biosynthetic pathways of the products of type I modular polyketide synthase
rBAN	https://link.springer.com/article/10.1186/s13321-019-0335-x	2019	2019	NP Prediction	Retro-biosynthesis algorithm	Prediction of the monomeric graph of NRPs from their atomic structure	Retro-biosynthesis - from NP to peptide
EvoMining	https://www.ncbi.nlm.nih.gov/pmc/articles/pmid/30946645/	2016	2019	NP Prediction	BLASTp	Allows the study of expansion-and-recruitment events in enzyme families (EFs) in Archaea and Bacteria, with the goal of providing both evolutionary insights and a genome-mining approach for the discovery of truly novel biosynthetic gene clusters	Uses pathway data
Ripper	https://github.com/streptomyces/ripper	2018	2018	NP Prediction	pHMM	Customisable tool for the identification of genes encoding putative precursor peptides within RiPP gene clusters
PlantClusterFinder + E2P2	https://www.ncbi.nlm.nih.gov/pmc/articles/pmid/28228535/	2017	2018	BGC Detection	BLAST + Markov Cluster Algorithm	Tool that uses genomic location information with enzyme and reaction data to identify metabolic gene clusters
BAGEL	https://academic.oup.com/nar/article-abstract/46/W1/W278/5000017	2006	2018	BGC Detection	BLAST	Web server that enables identification and visualization of gene clusters in prokaryotic DNA involved in the biosynthesis of RiPPs and (unmodified) bacteriocins
EFI-EST, EFI-GNT	https://pubs.acs.org/doi/abs/10.1021/acs.biochem.7b00614	2017	2017	Analysis	Sequence similarity networks	Sequence similarity networks to visualize and analyze sequence–function space in protein families (EFI-EST), genome neighborhood networks to visualize and analyze the genome context in microbial and fungal genomes (EFI-GNT)
SANDPUMA	https://www.ncbi.nlm.nih.gov/pmc/articles/pmid/28633438/	2017	2017	NP Prediction	Ensemble (algorithm, pHMM, SVM, MAFFT)	Analysis of NRP chemistry using ensemble prediction of adenylation domain substrate specificity	Used by antiSMASH
RiPPMiner	https://www.ncbi.nlm.nih.gov/pmc/articles/PMC5570163/	2017	2017	NP Prediction	SVM, Random Forest	Deciphering chemical structures of RiPPs based on prediction of cleavage and cross-links
PRISM	https://www.ncbi.nlm.nih.gov/pmc/articles/PMC5570231/	2015	2017	BGC+NP Prediction	pHMM + Rule-based, homology, virtual tailoring	BGC identification and chemical structure prediction of genetically encoded nonribosomal peptides (NRPs) and type I and II polyketides (PKs)
SBSPKS	https://dx.doi.org/10.1093/nar/gkx344	2010	2017	NP Prediction	BLAST + pHMM	Structure-based sequence analysis of PK synthetases and NRP synthetases
GRAPE	https://www.nature.com/articles/nchembio.2188	2016	2016	NP Prediction	Retro-biosynthesis algorithm	Generalized retro-biosynthetic assembly prediction engine for PKs and NRPs	Part of PRISM ecosystem
GARLIC	https://www.nature.com/articles/nchembio.2018	2016	2016	BGC-NP Pairing	Needleman-wunsch with adjustments	Alignment tool for comparison of BGCs and natural products. Alignment between PRISM and GRAPE results.	Part of PRISM ecosystem
FunGeneClusterS	https://www.sciencedirect.com/science/article/pii/S2405805X1530017X	2016	2016	BGC Detection	Rule-based	Predicting co-regulated fungal gene clusters from genome and transcriptome data
GNP Platform	https://www.nature.com/articles/ncomms9421	2015	2015	BGC-NP Pairing	Toolbox	Genome-guided natural products discovery platform to predict, combinatorialize and identify PKs and NRPs from biosynthetic assembly lines using LC–MS/MS data of crude extracts	Part of PRISM ecosystem
SEQL-NRPS	https://academic.oup.com/bioinformatics/article-lookup/doi/10.1093/bioinformatics/btv600	2015	2015	NP Prediction	SEQL (alignment gradient descent)	Tool for predicting substrate specificities of NRPS adenylation domains
CASSIS	https://www.ncbi.nlm.nih.gov/pmc/articles/pmid/26656005/	2015	2015	BGC Detection	Motif finding	Prediction of gene cluster borders for fungal BGCs using co-regulation	Uses promoter information. Used by antiSMASH
ClusterFinder	https://www.ncbi.nlm.nih.gov/pmc/articles/PMC4123684/	2014	2014	BGC Detection	pHMM + two-state HMM	Tool for identifying BGCs of both known and unknown classes based solely on Pfam domain frequencies	Two-state HMM
Pep2Path	https://journals.plos.org/ploscompbiol/article?id=10.1371/journal.pcbi.1003822	2014	2014	BGC-NP Pairing	Naive Bayes	Rapid Bayesian probabilistic matching of mass spectra to their corresponding biosynthetic gene clusters	Based on antiSMASH + NRPSpredictor2
RiPPquest	https://pubs.acs.org/doi/10.1021/cb500199h	2014	2014	BGC-NP Pairing	Spectral alignment	Tandem mass spectrometry database search tool for identification of microbial RiPPs
ClustScan	https://www.ncbi.nlm.nih.gov/pmc/articles/pmid/18978015/	2012	2012	BGC+NP Prediction	pHMM	Annotation of DNA sequences encoding PKS and NRPS biosynthetic enzymes
NAPDOS	https://journals.plos.org/plosone/article?id=10.1371/journal.pone.0034064	2012	2012	BGC+NP Prediction	pHMM, BLAST	Tool to extract and classify PKs and NRPs natural product domains and infer the generalized structures of secondary metabolites
SMURF	https://www.ncbi.nlm.nih.gov/pmc/articles/PMC2916752/	2012	2012	BGC Detection	pHMM	BGC detection in fungal genomes based on protein domain content and genomic context
NRPSsp	http://bioinformatics.oxfordjournals.org/content/early/2011/11/29/bioinformatics.btr659.abstract	2011	2011	NP Prediction	pHMM	NRPS substrate predictor
NRPSpredictor	https://academic.oup.com/nar/article/39/suppl_2/W362/2506164	2005	2011	NP Prediction	SVM	Prediction of NRPS A-domain specificity using Support Vector Machines on four hierarchical levels, ranging from gross physicochemical properties of an A-domain’s substrates down to single amino acid substrates	Used by antiSMASH
AntiBP	https://bmcbioinformatics.biomedcentral.com/articles/10.1186/1471-2105-11-S1-S19	2007	2010	NP Prediction	SVM	Antibacterial peptide prediction
CLUSEAN	https://www.sciencedirect.com/science/article/pii/S0168165609000078?via%3Dihub	2009	2009	BGC Detection	pHMM	Identification of domains and conserved motifs of PKS and NRPS, prediction of C-domain types
﻿NP.searcher	https://www.ncbi.nlm.nih.gov/pmc/articles/PMC2712472/	2009	2009	BGC+NP Prediction	BLAST	Identification of PKS, NRPS, or hybrid NRPS-PKS natural product clusters and prediction of substrate specificity
NRPS-PKS	https://www.ncbi.nlm.nih.gov/pmc/articles/PMC441497/	2004	2004	NP Prediction	BLAST	Knowledge-based approach for prediction of PKS and NRPS domain organization and substrate specificity
SEARCHPKS	https://www.ncbi.nlm.nih.gov/pmc/articles/pmid/12824387/	2003	2003	NP Prediction	BLAST	Detection and analysis of polyketide synthase domains
